# Supplementary material for: A Three-Gene Expression Signature Identifies a Cluster of Patients with Short Survival in Chronic Lymphocytic Leukemia
Source: J Oncol. 2019 Nov 7;2019:9453539. doi: 10.1155/2019/9453539 (PMC6885206; doi:10.1155/2019/9453539)
Supplement: Supplementary Materials — Supplementary Figure 1: individual patient clusterization according to the expression of the three selected genes in the training cohort (red and blue bars). Black bars represent gene expression for each patient in the cohort. Supplementary Table 1: expression levels of SCGB2A1, KLF4, and PPP1R14B, survival data, and cluster membership of patients in the training cohort. Supplementary Table 2: expression levels of SCGB2A1, KLF4, and PPP1R14B, survival data, and cluster membership of patients in the validation cohort. [file 9453539.f1.zip › 9453539.f1/Supplementary Tables_JO_2845136.xlsx]

## Sheet: Supplementary Table 1
ICGC ID	SCGB2A1	KLF4	PPP1R14B	Survival (days)	Censoring (1=death)	Cluster membership
1	7.96085	7.89001	9.1442	5573	1	1
2	7.84693	9.43675	9.98617	1976	1	2
3	7.93525	9.32741	9.28975	5327	0	2
4	7.64333	10.1222	9.04594	4452	0	2
5	7.68798	9.58513	9.22968	4473	0	2
6	7.34503	8.20961	9.97185	1038	1	1
7	8.15005	8.75366	9.53683	7206	0	2
8	7.47834	8.59358	9.27028	3297	0	1
9	7.67385	8.15173	9.72555	4684	1	1
10	7.8797	8.94368	9.41049	1178	0	2
11	7.91167	9.48104	9.271	2460	1	2
12	7.8827	10.142	9.82405	5535	0	2
13	7.70257	9.96866	9.81745	5887	0	2
15	7.91127	9.9646	9.30143	4706	0	2
16	8.0919	8.79142	9.36523	6965	0	2
17	7.6385	9.04491	9.46808	6060	0	2
18	7.63646	8.49747	9.35242	880	1	2
19	7.7485	9.13881	9.25542	4004	0	2
20	7.61118	9.15289	9.62287	3565	0	2
22	7.9449	9.75718	9.61861	3183	0	2
23	8.04845	9.12327	9.48992	3929	0	2
25	7.93829	9.09759	9.63401	3280	0	2
26	8.09648	9.61246	9.1736	3158	1	2
27	8.2294	9.26012	9.35789	4731	1	2
29	7.72951	9.3427	9.7264	2400	0	2
30	7.83165	9.42752	9.4697	2611	1	2
32	7.99793	7.43513	10.0895	2363	1	1
33	8.01314	9.07964	9.56554	3987	1	2
34	8.1508	9.1103	9.34014	5844	0	2
38	7.85229	9.4438	9.45228	1659	1	2
39	7.95082	10.5044	9.41763	3144	0	2
40	8.02711	9.60421	9.33917	4308	0	2
41	8.06716	8.84955	9.15368	1754	1	2
44	7.84531	10.0122	9.32476	2653	1	2
45	8.05907	10.1043	9.79925	2271	0	2
47	8.17403	9.33383	9.3811	2252	0	2
48	7.75468	9.89437	9.25583	2057	1	2
49	7.61886	9.23599	9.84746	4591	0	2
51	7.82829	9.7714	9.25594	6530	0	2
52	7.81659	9.09275	9.63402	3780	0	2
53	7.95445	9.96419	9.67074	5144	0	2
54	7.73712	9.9499	9.6113	1747	1	2
56	7.90638	8.71454	9.33604	2483	1	2
57	8.03611	9.02275	9.62064	2044	1	2
58	7.92582	9.44635	9.03025	2018	0	2
60	7.86087	10.2618	9.98485	5281	1	2
63	8.1076	9.25431	9.25356	3650	1	2
64	7.81182	9.53955	9.34382	3787	0	2
70	8.01894	9.81413	9.50096	4869	0	2
82	8.20512	8.89105	10.2974	3407	1	1
83	7.45868	9.48171	9.58036	1927	1	2
84	8.02173	9.25815	9.67882	6277	0	2
90	8.05055	10.1391	9.21113	4277	0	2
91	7.79497	10.0693	9.18132	2709	0	2
100	7.91216	8.98809	9.62074	4327	0	2
398	7.66823	9.85722	9.77243	1842	0	2
422	7.65851	9.60002	9.66645	6181	0	2
435	7.93748	9.79321	9.22716	1890	0	2
442	7.86456	9.17331	9.38902	5473	1	2
447	7.77677	9.27532	9.2166	5229	0	2
464	7.98087	9.36845	9.14102	4705	0	2
466	7.80071	9.75374	9.7387	4640	0	2
467	7.85655	10.1766	9.65942	4786	0	2
472	7.74649	9.67925	9.05628	4743	0	2
473	7.89159	9.86693	9.12726	9075	0	2
474	7.85294	10.1606	9.77149	4734	0	2
475	7.96558	9.62532	9.50146	3730	1	2
477	8.01471	9.73202	8.90728	4665	0	2
504	7.95071	9.34102	9.32023	4610	0	2
505	7.89631	10.7795	9.35231	4536	0	2
509	8.00096	10.2095	9.1479	4555	0	2
510	8.09378	10.1437	9.15222	4316	0	2
1047	7.71121	9.44886	9.32655	2312	0	2
523	7.6255	9.94859	9.1166	3985	0	2
1050	7.88855	10.2952	9.34294	2199	0	2
535	7.97686	8.78006	9.39164	6446	0	2
1052	8.08066	9.29438	9.15298	182	0	2
1053	8.01983	10.016	9.1539	3726	0	2
544	8.24827	8.75985	9.75279	9678	0	1
1054	8.1485	10.0001	9.05425	1092	0	2
558	8.01739	10.0853	9.73933	7062	0	2
561	7.64806	9.8082	9.44716	7374	1	2
564	7.69028	9.40381	9.1871	4762	0	2
565	7.77519	9.84482	9.2216	2877	0	2
567	7.95512	9.90311	8.71959	1661	0	2
569	8.05895	9.15362	9.12783	1073	1	2
571	7.90388	8.55176	9.13412	2406	0	2
575	7.89932	9.16664	9.28742	1793	0	2
577	7.93873	8.65943	9.38611	1310	0	2
578	7.87143	9.05273	9.5565	1911	0	2
580	8.1512	9.10185	9.407	1961	0	2
583	7.93942	9.95363	9.65599	3476	0	2
584	7.94356	8.83257	9.357	2628	0	2
585	7.84958	9.20362	9.3611	2495	0	2
586	8.16442	8.788	9.4839	1534	0	2
588	7.81712	9.26162	9.46142	21	0	2
591	8.09305	8.65467	9.56019	9217	0	2
593	7.55187	10.7112	8.95491	1061	0	2
594	8.1293	9.86318	9.77009	2373	1	2
595	8.15724	8.06789	9.14776	1287	0	1
596	7.95766	9.82088	9.06178	1969	0	2
598	7.68882	9.12857	9.50699	4472	0	2
599	7.74228	9.61885	9.77912	1204	0	2
618	8.15867	10.1887	8.82742	2604	0	2
1059	7.87647	9.96858	9.67662	2385	0	2
621	7.96518	9.50324	9.10357	5353	0	2
626	7.95874	9.04208	9.38277	3778	0	2
628	7.84344	9.72066	9.20538	3087	0	2
629	8.08161	10.076	9.35193	4543	0	2
642	7.79258	9.85053	9.31429	4326	0	2
654	7.68874	9.46949	9.12748	2369	0	2
658	7.82206	9.51311	9.40591	6728	0	2
661	8.12973	9.75648	9.27353	3574	0	2
663	7.72761	9.62848	9.1515	2118	1	2
664	7.81428	9.03261	9.19348	2085	0	2
669	7.94527	9.22541	9.15465	3463	0	2
1062	7.50995	10.2411	9.3919	1165	0	2
1063	8.07563	9.68464	9.74334	3071	0	2
677	7.49184	10.2429	9.26528	3034	0	2
680	8.07118	9.13824	9.47283	4222	1	2
684	7.75896	10.0562	9.18979	2113	0	2
689	7.85818	9.08584	9.07576	3635	0	2
709	7.73533	9.97926	9.37323	1931	0	2
715	7.62186	9.26494	9.67248	1989	0	2
721	8.16343	9.25226	9.80119	2715	0	2
722	7.91947	10.305	9.43696	2164	1	2
1066	8.11201	9.6847	9.19273	3899	0	2
723	8.19674	8.80121	9.55683	5042	0	2
725	7.83386	8.75055	9.40034	2115	0	2
1075	7.73414	9.07907	9.80308	3255	0	2
732	7.83562	9.51551	9.34069	3853	0	2
733	7.71824	9.16113	9.31419	3034	0	2
745	7.63508	9.75344	9.3773	8141	1	2
749	7.5584	9.35824	9.47636	1828	0	2
751	7.82689	9.21061	9.4445	2437	0	2
753	7.81421	9.59712	9.32222	2030	0	2
754	8.12609	9.64944	9.80444	3157	0	2
1076	7.87675	10.4783	9.45914	2023	0	2
757	7.98976	10.41	9.35733	1647	0	2
758	8.1414	9.63994	9.21316	3628	0	2
760	8.07322	8.35875	9.08967	2416	0	2
761	7.88425	9.34095	9.06324	3572	0	2
762	7.86295	9.51149	9.43453	1249	0	2
763	7.96412	9.70094	9.41973	2670	0	2
764	7.83853	9.91868	9.17819	3980	0	2
765	7.92154	10.2332	9.36145	1477	0	2
766	8.08206	9.6011	9.29376	1750	0	2
767	8.0688	9.30527	9.56986	3702	0	2
769	7.72907	9.65292	9.50134	3115	0	2
1078	8.00793	10.1628	9.63213	1568	0	2
770	8.13889	9.74254	9.42717	2019	0	2
772	8.22376	9.39493	8.85065	1364	0	2
773	7.86109	9.94495	9.02713	1572	0	2
775	8.03963	9.6572	9.13196	1364	0	2
1079	8.18158	9.22365	9.06523	985	0	2
776	7.68779	9.60472	9.48896	1931	0	2
777	7.67369	9.26196	9.31426	1055	0	2
1080	7.94364	9.15777	8.79105	2143	0	2
778	7.94916	10.2432	9.47854	1449	0	2
780	7.62133	8.93878	8.91576	4529	0	2
1096	8.11745	8.94444	9.51328	2037	0	2
783	7.72574	10.3549	9.47207	4788	0	2
784	8.14966	8.35043	9.49884	1784	0	1
1098	7.98643	9.84796	8.95525	2827	0	2
785	8.0505	9.44866	9.60703	244	0	2
788	7.95001	9.19231	9.18115	1526	0	2
1100	8.06539	9.85071	9.63217	1843	0	2
794	8.06692	10.5053	9.39009	3418	0	2
110	7.7721	9.65576	9.42481	4592	0	2
797	7.78881	10.238	9.02763	7762	0	2
800	7.93983	9.64026	9.01593	5211	0	2
801	7.60461	9.91247	8.99425	1463	0	2
1101	7.89956	10.4987	9.78185	2409	0	2
802	7.87329	9.82824	9.22726	1729	0	2
804	7.91296	10.4162	9.42932	2429	0	2
805	7.98188	9.21843	9.28734	3196	0	2
809	8.04078	9.81982	9.60308	2231	0	2
811	8.16379	9.58028	9.20227	1238	0	2
812	7.5836	10.3538	9.11173	845	1	2
813	8.00153	9.77052	8.80327	1034	0	2
814	7.98055	9.62086	9.02475	3801	0	2
815	8.20598	9.26506	9.18792	6319	0	2
1103	7.8499	10.0761	9.63754	4272	0	2
820	7.82724	10.0896	8.9103	2277	0	2
821	7.91681	10.0692	9.12074	1414	0	2
824	7.50386	9.42934	9.26896	84	1	2
826	8.23249	9.75152	8.94853	2614	0	2
829	7.88943	8.86389	9.85374	1605	0	2
830	8.03738	9.09	9.28336	1484	0	2
111	7.32332	9.7021	8.78291	6349	0	2
831	7.97452	9.663	9.1782	1549	0	2
1141	7.96048	9.84684	10.1182	3584	1	1
841	7.81991	9.52568	9.47375	1704	0	2
842	7.93011	9.78892	8.99802	1828	0	2
850	8.12492	10.0366	9.71622	2304	0	2
852	8.33138	10.0325	9.10175	7650	0	2
114	7.82745	10.3298	9.20125	6532	0	2
853	7.40282	9.20278	9.75728	1032	1	1
854	7.76642	9.63397	8.96376	582	0	2
855	8.05135	9.89113	9.08807	4424	0	2
857	7.9814	9.40533	9.6078	1502	0	2
115	7.85003	10.239	9.04777	7174	0	2
859	8.00119	9.21399	9.27946	5304	0	2
860	7.72106	9.68807	8.86615	3052	0	2
861	7.89083	9.75268	9.24885	2276	0	2
1161	7.93234	10.0809	9.17783	2215	0	2
116	7.8633	9.90765	9.58334	2149	0	2
868	7.73767	9.20962	9.29733	3789	0	2
1162	8.11869	10.3241	9.10095	1172	0	2
869	8.1986	8.98125	9.42948	3214	1	2
1163	7.77014	9.82555	9.52529	1083	0	2
873	7.85212	9.62653	9.5651	5408	0	2
875	7.8434	10.3183	9.1708	3612	1	2
878	7.96189	9.41514	9.32712	1163	0	2
880	7.78249	9.52574	9.26748	4320	0	2
1164	8.20216	9.26857	9.50646	1884	0	2
1165	8.01573	9.22983	9.23604	1281	0	2
884	8.03997	9.69002	9.15788	2027	0	2
885	7.60451	9.07253	8.95094	1719	0	2
886	7.99768	9.98243	9.43718	3213	0	2
887	8.05335	9.00374	9.10295	646	0	2
1166	8.37525	9.15803	9.58195	2044	0	2
1167	8.28673	8.3918	9.27823	1244	0	1
898	7.73355	9.68402	9.17047	1986	1	2
1168	8.14531	10.0344	9.33732	1313	0	2
1169	8.19488	9.60402	9.68095	1106	0	2
117	7.72214	9.13196	9.23828	7631	0	2
1175	7.9824	10.1743	9.20983	862	0	2
1177	7.78186	10.5083	9.57221	955	0	2
1178	7.95596	9.71366	9.62061	845	0	2
1181	7.78224	10.1353	9.56207	1223	0	2
1183	7.88863	10.4363	9.71356	1049	0	2
1184	7.64121	10.4334	8.96606	5238	0	2
1185	7.79711	10.116	9.16672	7274	0	2
1187	7.18178	9.24047	9.36865	1414	0	1
1188	8.01489	10.546	9.19842	2602	0	2
1191	7.56801	9.88685	9.13041	2350	1	2
1192	7.32051	10.218	9.50979	2163	1	2
1193	7.51317	9.58687	9.24858	1251	0	2
1198	7.68229	10.1213	9.40617	2315	0	2
1220	7.73266	9.45166	9.60063	3161	0	2
122	7.91247	9.81702	9.71225	5908	0	2
1222	7.83456	9.56119	9.40673	5270	0	2
1223	7.83238	10.1535	10.2552	634	0	1
1226	7.93256	9.25409	9.07418	1461	0	2
1228	7.9004	10.2758	9.36346	6302	0	2
1229	7.90563	10.069	9.16799	4059	0	2
1236	7.98974	9.99126	9.21407	1803	0	2
1237	7.81042	9.8706	8.88054	1366	0	2
1238	8.06359	10.1059	8.78971	1626	0	2
1239	8.03087	10.288	9.58915	5888	0	2
124	8.15925	9.77453	9.36391	4060	0	2
125	8.0729	10.668	8.91705	1288	0	2
1254	8.07501	9.10159	8.83051	863	0	2
1256	7.74724	9.45625	9.43392	1079	0	2
1257	7.91172	10.5164	8.9313	797	0	2
1260	7.78755	10.7239	9.33877	2096	0	2
1266	7.92215	9.13118	8.97603	793	0	2
1267	8.23372	9.70717	9.57089	996	0	2
1270	8.04925	8.5883	9.40587	1085	0	2
127	8.06329	9.89802	9.34067	6503	0	2
1271	7.92294	9.01389	9.2982	2394	0	2
1276	8.06975	9.36268	9.84725	2204	0	2
128	7.99268	9.32555	9.47499	4450	0	2
1290	7.91308	9.70907	9.11997	2291	0	2
1291	7.7977	9.82177	9.8047	3410	0	2
1292	7.93078	9.6229	8.95795	3364	0	2
1294	7.81151	9.01758	9.42019	940	0	2
1295	7.98349	10.0342	9.42439	2473	0	2
1307	7.72844	9.05414	9.55383	911	0	2
131	8.03073	9.78612	9.14431	8429	0	2
1311	8.17889	8.76164	9.40363	1452	0	2
1312	7.72381	10.1639	9.47993	768	0	2
1313	8.10058	9.173	9.37675	871	0	2
1317	8.09901	9.74621	9.79002	939	0	2
1323	8.09009	10.8183	9.39105	1435	0	2
1326	8.05264	10.0594	9.58381	3886	0	2
1327	7.90674	9.93216	9.38521	4653	0	2
1328	8.11358	9.4128	9.95023	766	0	2
1338	7.69185	10.2203	9.10818	730	0	2
1339	8.0042	10.121	9.48027	1921	0	2
134	7.90434	9.03719	9.41948	5315	0	2
1343	7.81945	9.77209	9.08327	969	0	2
1344	8.00764	9.4068	9.39507	3881	0	2
1345	7.93287	9.72554	9.00466	1071	0	2
1346	7.44093	9.05975	9.287	1286	0	2
135	7.41234	10.7405	9.30672	3187	1	2
1353	7.59669	9.75379	9.14286	2912	0	2
1360	7.84344	9.72066	9.20538	694	0	2
136	8.06187	8.73277	9.53614	8611	0	2
1364	7.72059	9.84046	9.25334	4703	0	2
1365	8.06745	9.54359	9.06595	3783	0	2
137	8.09104	9.66756	8.99868	9403	0	2
1371	7.88938	10.5512	9.46419	1388	0	2
1380	7.72706	10.4468	8.8146	3248	0	2
138	7.58624	9.97157	9.57834	3246	1	2
1384	7.45027	9.49986	9.21415	1883	0	2
1386	7.97352	10.2377	9.83846	714	0	2
139	7.90767	8.98021	9.27053	4429	0	2
1403	8.00322	9.93693	9.25248	NA	0	2
1407	7.85356	9.56852	9.14501	739	0	2
141	7.94573	9.19142	8.96066	2698	1	2
1413	8.04767	9.89086	9.59464	1395	0	2
1416	8.1388	9.86542	10.0553	479	0	1
1418	8.09935	9.93386	9.50221	2108	0	2
142	8.38446	9.04807	9.34487	4291	0	2
1423	7.51322	10.2778	8.74222	2197	0	2
1424	7.84989	9.55154	9.35737	3380	0	2
1425	7.58778	9.80098	9.06205	1707	0	2
1430	7.62776	9.53645	9.1811	802	0	2
1431	7.74609	9.56025	9.59078	755	0	2
1432	7.81201	10.231	9.57957	1707	0	2
1437	7.76364	8.94816	9.07614	571	0	2
1441	7.75902	9.42743	9.01554	859	0	2
1442	7.76378	11.0777	9.03992	537	0	2
1446	7.81327	9.21859	9.57851	2701	0	2
1447	7.44259	9.77298	9.45427	686	0	2
1448	7.85845	9.30026	8.98347	1532	0	2
145	7.94156	8.28201	9.58678	1438	1	1
1452	8.13572	9.70523	9.57048	1628	0	2
146	8.01001	9.66292	9.65214	4421	0	2
1462	7.97082	10.4482	9.28788	4418	0	2
1464	7.74549	9.54067	9.46949	495	0	2
1465	7.78791	9.62526	9.54953	418	0	2
147	7.8739	9.43214	9.68991	2078	0	2
1471	8.08305	9.81401	9.53622	2963	0	2
1472	8.15486	9.73928	9.65109	1429	0	2
1477	7.73616	9.7876	9.23799	3025	0	2
148	7.83413	9.94651	9.22828	1882	0	2
1481	8.01564	10.2327	9.50176	1583	0	2
1484	8.05586	9.38813	9.61538	469	0	2
1489	7.96067	9.32321	10.1762	889	0	1
149	8.12427	9.94685	9.30755	3763	0	2
1491	8.03193	9.15969	9.35334	1474	0	2
150	7.44916	9.15853	9.10793	2795	0	2
151	7.99006	9.1289	8.86638	1455	1	2
1525	7.93858	9.92341	9.3196	266	0	2
1533	7.98936	9.77261	9.34466	459	0	2
1534	7.87425	9.5217	9.42916	5315	0	2
1535	8.17471	10.0054	9.28666	665	0	2
1543	7.85208	10.43	9.48306	186	0	2
1545	7.92538	9.64182	9.83962	204	0	2
155	7.75192	9.27394	9.43377	4145	1	2
156	7.81289	9.55876	9.08527	1835	0	2
1564	7.92064	9.91252	9.30589	1710	0	2
1565	8.07136	9.96627	8.84277	6616	0	2
1566	7.76402	10.3502	8.71198	636	0	2
1567	7.85072	8.9603	9.80279	301	0	2
1568	7.84821	9.54077	9.09501	475	0	2
157	8.0748	9.68984	9.01664	1630	0	2
158	7.81815	9.51099	8.88931	1687	0	2
1587	7.97864	10.5268	9.10837	251	0	2
159	7.91462	9.31891	9.14598	6112	0	2
165	7.99496	9.04818	9.28445	2630	0	2
166	7.97083	9.88435	8.93449	2596	0	2
168	8.05644	8.73359	9.37737	6524	0	2
170	7.90607	9.22067	9.61679	6777	0	2
171	7.87939	9.5212	8.66172	8579	0	2
172	8.10774	9.6133	9.39994	7686	0	2
173	7.94653	9.34335	9.1389	5537	0	2
174	8.09257	10.2093	9.97398	4595	0	2
175	7.89496	9.02111	9.25593	4764	0	2
176	7.71487	10.2813	9.97165	2227	1	2
177	7.58235	9.95409	9.54902	1914	0	2
179	7.59161	9.83825	8.88722	4743	0	2
180	7.84531	10.0122	9.32476	5918	0	2
181	7.95208	9.48806	9.55987	3475	0	2
182	7.92049	9.87687	9.631	1317	1	2
184	8.06028	10.2621	9.06671	1696	0	2
185	8.13386	9.58123	9.19672	3597	0	2
186	8.0124	9.14417	9.32546	9663	0	2
188	7.94796	8.31971	9.88394	2543	1	1
189	7.84859	9.66868	9.42864	3343	0	2
191	7.79267	8.97975	9.25065	5819	0	2
192	7.69842	10.2526	9.38514	1807	0	2
193	7.84781	8.90301	9.34119	3276	0	2
194	7.92992	9.81798	9.06467	8405	0	2
195	7.92189	8.88203	9.35301	3658	0	2
197	7.95324	8.81099	9.25742	3263	0	2
199	8.1159	9.30297	9.537	2127	0	2
264	7.96504	9.11752	8.93624	2402	0	2
266	8.13588	9.35545	8.97812	2551	0	2
267	8.11205	9.00105	9.37861	5034	0	2
270	7.60075	9.20773	9.14612	2930	0	2
272	7.66829	9.17333	9.64392	3309	1	2
273	7.85665	9.27179	8.83944	4663	0	2
274	8.13467	9.44117	9.44186	4692	0	2
275	7.81666	9.54158	9.40924	2493	0	2
276	7.91203	9.17122	9.3446	2893	0	2
278	7.93877	9.12225	9.37173	2414	1	2
279	7.77149	8.65736	9.62785	2307	1	2
280	7.80569	9.15307	9.34961	5871	0	2
282	7.90603	9.29546	9.08996	1037	1	2
283	7.64383	8.83061	9.16993	6099	0	2
287	7.39854	9.1736	9.45118	6031	1	2
288	8.52073	9.61507	8.90499	1978	0	2
289	7.78198	9.71585	9.17889	3622	0	2
290	7.49188	10.3112	8.80936	686	1	2
291	7.85304	9.73781	9.25855	3681	0	2
294	7.84776	9.40835	9.48287	1001	1	2
296	7.8779	9.4752	9.03886	1177	1	2
298	7.9763	9.30111	9.64643	1632	0	2
302	8.15676	9.93616	9.30723	4233	0	2
305	8.08824	9.67752	9.43323	3223	0	2
306	8.19206	9.59142	9.56449	1153	1	2
312	7.66318	9.53607	9.41513	2392	0	2
313	7.95826	9.70371	9.44233	3519	0	2
315	7.96546	9.35741	9.66512	2338	0	2
316	7.73342	9.18893	9.48843	2898	0	2
317	7.85864	9.46469	9.43085	2217	0	2
318	7.75479	10.0222	9.39428	2235	0	2
319	8.39314	9.21117	9.04662	3880	0	2
321	7.92473	10.145	9.66732	1813	0	2
322	8.2936	9.46039	9.84891	5465	0	2
323	7.94285	8.77477	9.14174	1393	0	2
324	8.08173	9.71108	9.47708	3241	0	2
325	7.65144	9.09082	9.32581	1553	0	2
326	7.77237	8.62983	9.41745	3260	1	2
328	8.05199	9.2026	9.37699	2363	0	2
329	7.88657	8.13576	9.47182	2425	1	1
330	7.61756	9.11059	9.03068	1820	0	2
331	7.83936	9.44001	9.32163	1935	0	2
333	7.72656	9.38306	8.94196	3884	0	2
338	8.07557	9.56817	9.69685	2470	0	2
341	7.88762	10.5335	9.31269	2716	0	2
342	7.5967	9.03215	9.23089	2963	0	2
343	7.97604	9.87076	9.16379	2698	1	2
344	7.74631	8.97412	9.74499	3992	0	2
345	7.55146	9.63797	9.34647	2673	1	2
350	7.66979	9.88629	9.4903	2262	0	2
351	7.72981	10.2249	9.25885	5993	0	2
352	7.7623	9.57244	9.56993	8113	0	2
353	8.23679	9.25177	9.31481	3808	0	2
356	7.77616	9.49312	9.24494	1865	1	2
358	7.53462	9.56578	9.27523	94	1	2
361	7.71891	8.9424	9.33186	2355	0	2
365	8.01184	10.3207	9.51665	2223	1	2
366	7.83064	9.43076	9.13774	7695	0	2
367	7.74272	10.0688	9.1082	1868	0	2
371	7.81985	9.48609	9.45209	2659	0	2
372	7.91125	9.6483	9.12873	3150	0	2
373	7.86121	9.82151	9.03725	4119	0	2
375	7.83616	9.14667	9.37965	3954	0	2
381	7.79052	9.59451	9.23594	1781	1	2
382	8.15144	9.56429	9.22298	1482	0	2
384	7.91158	8.80021	9.6516	1436	0	2
385	8.27115	8.50964	9.10891	4857	1	2
386	7.95818	9.49251	9.34287	874	1	2
387	7.89835	9.26548	9.5183	1975	0	2
395	7.96783	9.56551	9.56542	1195	0	2

## Sheet: Supplementary Table 2
GEO ID	SCGB2A1	KLF4	PPP1R14B	Survival (days)	Censorship (1=death)	Cluster membership
GSM562948	7.62607	9.32177	9.45349	1417	0	2
GSM562949	8.02611	9.47052	9.16681	2217	0	2
GSM562950	7.97732	9.87015	9.3783	1608	0	2
GSM562951	7.79194	10.2032	9.63677	1197	0	2
GSM562952	7.81145	9.91234	9.50519	1556	0	2
GSM562953	7.98708	9.21298	9.3971	1415	0	2
GSM562954	8.04562	9.14193	9.27961	1499	0	2
GSM562955	7.78218	9.70142	9.3501	1322	0	2
GSM562956	7.63582	8.47144	9.62268	364	1	1
GSM562957	7.79194	10.8604	9.3689	488	1	2
GSM562958	7.86999	10.7183	9.23261	653	1	2
GSM562959	7.78218	9.18856	9.22791	1464	0	2
GSM562960	7.73339	10.2076	9.47229	957	0	2
GSM562961	8.38712	9.63703	9.07282	1812	0	2
GSM562962	7.93829	9.32621	9.42059	1175	0	2
GSM562963	7.64558	10.1699	9.3877	1289	0	2
GSM562964	7.87975	9.83907	9.09162	1147	0	2
GSM562965	8.17246	10.2742	9.09162	1812	0	2
GSM562966	8.06513	9.73028	9.68847	426	1	2
GSM562967	8.05538	9.99892	9.62738	1036	0	2
GSM562968	7.80169	10.0966	9.50519	1358	0	2
GSM562969	7.77242	9.79245	9.23261	952	0	2
GSM562970	7.72364	9.8857	9.49579	1308	0	2
GSM562971	7.85048	9.18412	9.26081	2005	0	2
GSM562972	8.03586	10.201	9.12922	1359	0	2
GSM562973	7.90902	10.3808	9.69317	1509	0	2
GSM562974	7.72364	9.87237	9.72607	1178	0	2
GSM562975	7.84072	9.55933	8.73915	261	1	2
GSM562976	8.42614	9.77691	9.12922	1445	0	2
GSM562977	7.77242	8.86885	9.68847	1242	0	2
GSM562978	8.01635	9.35063	9.08692	1560	0	2
GSM562979	7.75291	9.43056	8.64046	1513	0	2
GSM562980	7.76267	8.68235	9.42529	1155	0	2
GSM562981	7.86024	8.34933	9.48169	245	1	2
GSM562982	7.83096	9.24406	9.24201	1109	0	2
GSM562983	7.74315	8.709	9.3595	1460	1	2
GSM562984	7.71388	9.55489	9.17621	1441	0	2
GSM562985	7.93829	9.4239	9.23731	1305	0	2
GSM562986	8.04562	9.02204	9.22321	1684	0	2
GSM562987	8.08465	8.74896	9.01173	1414	0	2
GSM562988	8.02611	9.18634	8.83784	1623	0	2
GSM562989	7.82121	10.1188	9.08222	1365	0	2
GSM562990	7.86999	8.96432	9.48639	1090	1	2
GSM562991	8.11392	9.80355	9.57098	1339	0	2
GSM562992	8.06513	9.71696	9.2937	1354	0	2
GSM562993	7.75291	9.24406	9.48639	1329	0	2
GSM562994	8.12368	8.68902	9.45819	139	1	2
GSM562995	7.78218	9.12417	9.60388	305	1	2
GSM562996	7.97732	9.38393	9.3172	690	1	2
GSM562997	7.87975	9.66368	10.1208	280	1	1
GSM562998	7.80169	9.26848	9.45819	1183	0	2
GSM562999	7.5968	10.232	9.3172	1394	0	2
GSM563000	8.1627	9.04869	8.84724	1552	0	2
GSM563001	7.92854	9.87681	8.97883	1371	0	2
GSM563002	7.50898	9.25294	9.50049	1131	1	2
GSM563003	8.08465	9.70364	9.3313	1462	0	2
GSM563004	7.87975	9.08643	9.78246	1330	1	2
GSM563005	8.11392	9.23074	9.20911	1266	0	2
GSM563006	7.85048	9.02426	9.40179	1628	0	2
GSM563007	8.02611	9.59263	9.40649	1088	0	2
GSM563008	7.91878	10.2121	9.57098	485	1	2
GSM563009	7.79194	9.10197	9.04463	1260	0	2
GSM563010	8.01635	8.88439	9.04933	1574	0	2
GSM563011	7.67485	10.4252	9.58978	1300	0	2
GSM563012	7.71388	9.02648	9.08222	2076	0	2
GSM563013	7.99683	9.57043	9.2843	1423	0	2
GSM563014	7.89926	10.0078	9.03523	1247	0	2
GSM563015	7.99683	9.7547	9.73077	1169	0	2
GSM563016	7.77242	9.06867	9.13862	1649	0	2
GSM563017	7.90902	9.90568	9.58978	1547	0	2
GSM563018	7.71388	9.15081	9.63208	1467	0	2
GSM563019	8.01635	7.75876	9.60388	407	1	1
GSM563020	7.81145	9.76803	9.2984	1036	0	2
GSM563021	7.93829	9.50382	9.289	1118	0	2
GSM563022	7.83096	9.14637	9.3078	24	1	2
GSM563023	8.00659	10.4962	9.26551	854	0	2
GSM563024	8.34809	9.74582	9.07282	1275	0	2
GSM563025	7.72364	9.37727	10.149	1535	0	1
GSM563026	7.77242	8.88883	9.3266	1159	0	2
GSM563027	7.86024	9.54823	9.55218	797	1	2
GSM563028	7.84072	9.61039	9.3783	1074	0	2
GSM563029	7.92854	10.3875	9.27961	1403	0	2
GSM563030	7.88951	10.0522	9.40649	1374	0	2
GSM563031	7.84072	9.44388	9.09632	1421	0	2
GSM563032	7.76267	10.2809	9.60858	1286	0	2
GSM563033	7.82121	10.443	9.76836	1406	1	2
GSM563034	7.58704	10.5562	9.43469	1270	0	2
GSM563035	7.87975	9.15969	9.48169	1051	0	2
GSM563036	7.85048	9.36395	10.3182	168	1	1
GSM563037	7.72364	9.97672	9.3548	34	0	2
GSM563038	8.10416	10.2365	9.45819	1164	0	2
GSM563039	8.5725	10.2742	9.05402	11	1	1
GSM563040	8.00659	8.74674	8.96473	1560	0	2
GSM563041	7.69437	9.4239	9.44409	918	0	2
GSM563042	8.11392	9.73694	8.80495	1842	0	2
GSM563043	7.89926	9.26626	9.27961	1549	1	2
GSM563044	7.89926	9.21742	8.92244	1457	0	2
GSM563045	7.89926	9.78801	9.55688	1127	0	2
GSM563046	8.07489	9.57709	9.74017	267	0	2
GSM563047	7.81145	10.4341	8.95533	1907	0	2
GSM563048	7.70412	10.0145	8.96943	1568	0	2
GSM563049	8.05538	10.1788	9.24671	1539	0	2
GSM563050	8.01635	8.98208	9.3736	938	0	2
GSM563051	7.79194	9.62149	9.3736	1137	0	2
GSM563052	7.86024	10.4274	9.16212	161	1	2
GSM563053	7.83096	8.40261	9.57098	1441	0	2
GSM563054	7.70412	9.85905	9.54278	1509	0	2
